# Supplementary material
Source: Springer Nature journal article supplement (https://www.springermedizin.de/resource/supplementary/12974_2011_377_MOESM6_ESM.pdf/9601530)

**phospho-STAT3**

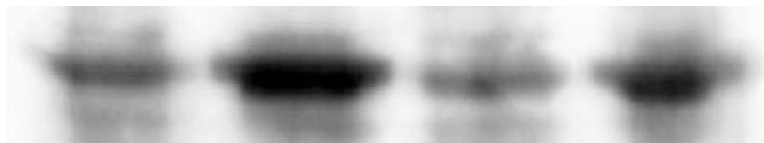

**STAT3**

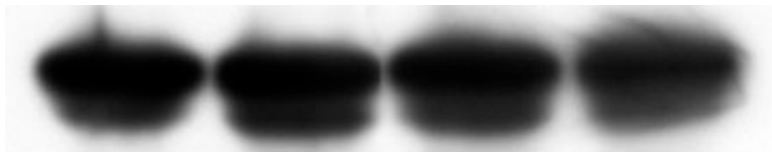

**Lane**

**1**

**2**

**3**

**4**

**midazolam**

-

-

+

+

**IL-1 $\beta$**

-

+

-

+

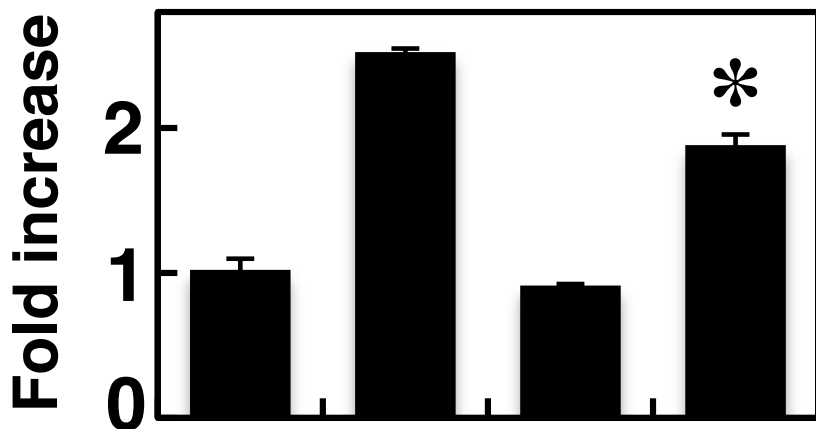

**Lane**

**1**

**2**

**3**

**4**

Supplement: MOESM6 [file 9601530]
